# Supplementary material
Source: PubMed Central journal article supplement (PMC6937579)
Supplement: supp_RA119.010943_155647_1_supp_426712_q0t8hn.pdf [file supp_RA119.010943_155647_1_supp_426712_q0t8hn.pdf]

# Fig. 1 SUPPL

**A**

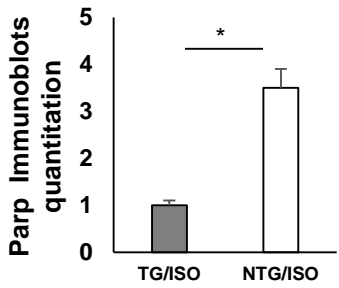

**B**

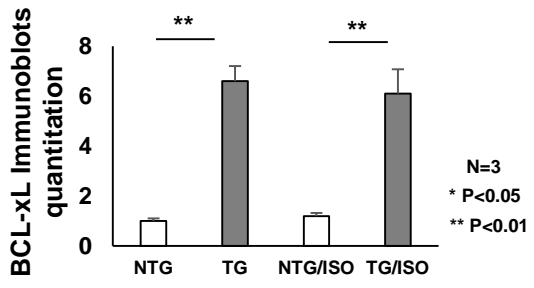

(A) Quantification of Western blot analysis of the level of cleaved Parp in ISO-treated TG hearts and ISO-treated NTG control hearts; (B) Quantification of Western blot analysis of the level of cell survival factor Bcl-xL in ISO-treated TG hearts and ISO-treated NTG control hearts.

# Fig. 2 SUPPL

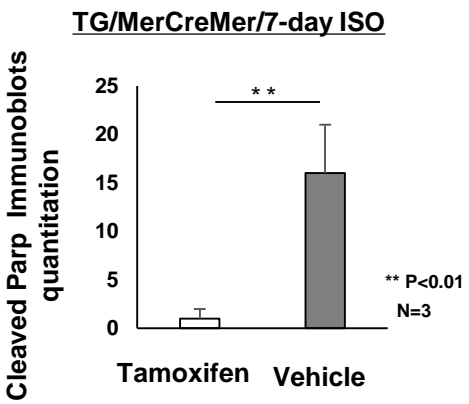

Quantification of Western blot analysis of the level of cleaved Parp in ISO-treated tamoxifen induced TG hearts and ISO-treated vehicle induced NTG control hearts.

**Fig. 3 SUPPL**

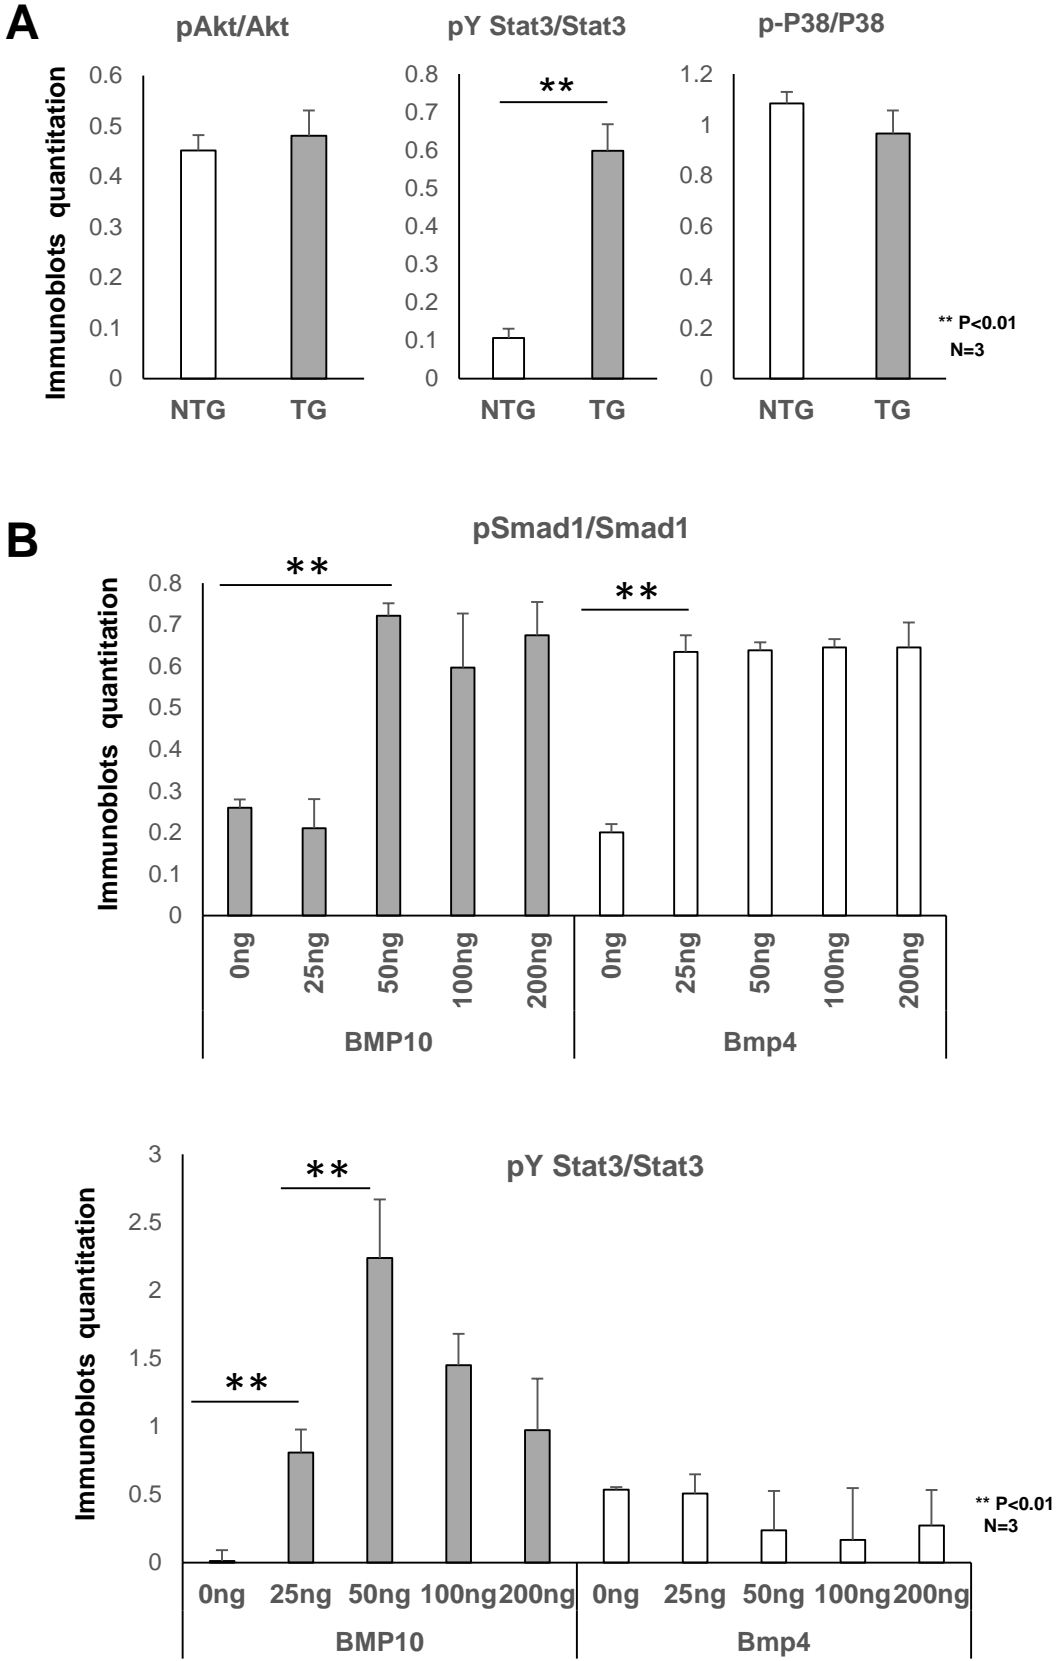

# Fig. 3 SUPPL

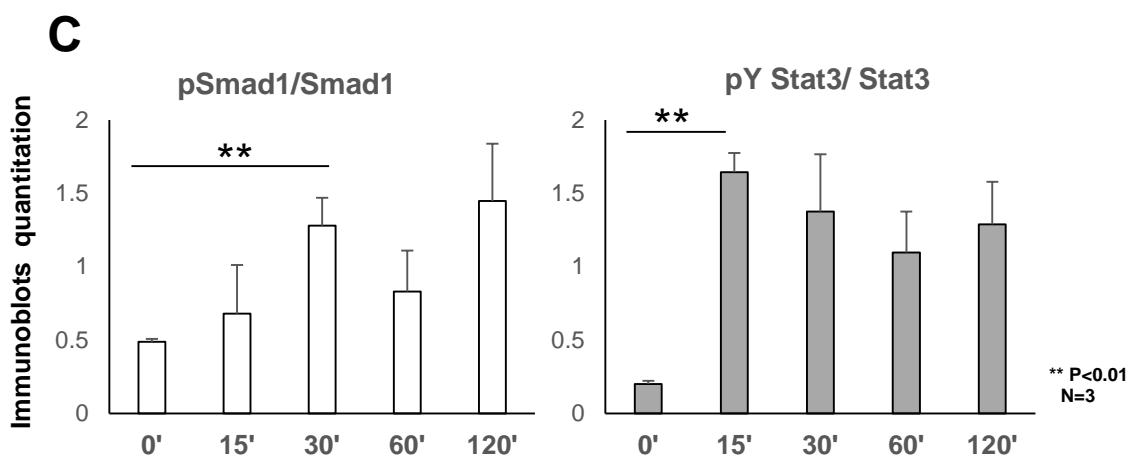

(A) Quantification of Western blot analysis of the level of pAkt/Akt, pSTAT3/STAT3, and pP38/P38 in TG hearts and NTG control hearts; (B) Quantification of Western blot analysis of the level of pSmad1/Smad1 and pSTAT3/STAT3 in P19 cells treated with BMP10 and BMP4 at various concentrations, respectively; (C) Quantification of Western blot analysis of the level of pSmad1/Smad1 and pSTAT3/STAT3 in P19 cells treated with BMP10 at various durations.

**Fig. 4 SUPPL**

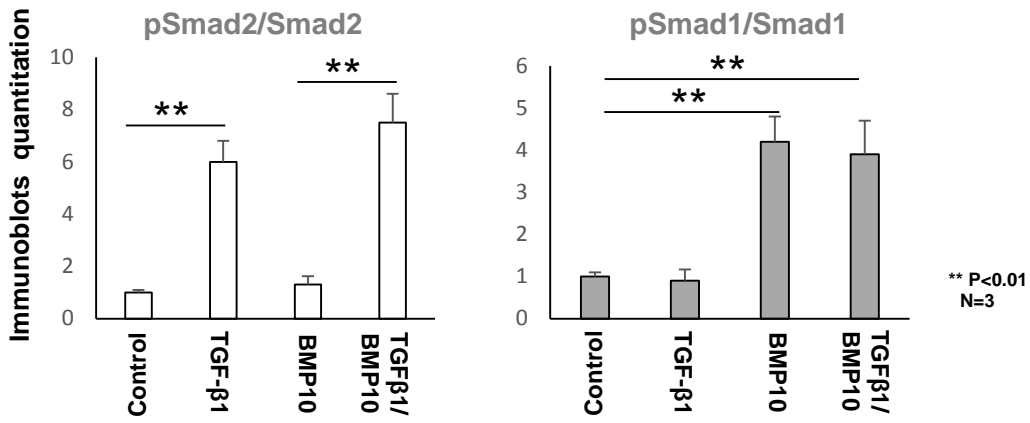

Quantification of Western blot analysis of the level of pSmad2/Smad2 and pSmad1/Smad1 in cardiac fibroblast cells treated with TGF 1 and BMP10.

# Supl Table 1

| <b>Gene name</b> | <b>Forward primer</b>  | <b>Reverse primer</b>   |
|------------------|------------------------|-------------------------|
| RPL7             | GCTGCGGATTGTGGAGCCATAC | CCTCCATGCAGATGATGCCAAAC |
| Col3a1           | CACCCTTCTTCATCCCCTC    | TCTCCAAATGGGATCTCTGG    |
| col1a1           | TGTTTCAGCTTTGTGGACCTC  | TCAAGCATACCTCGGGTTTC    |
| Bmp10            | CCACCAGAGTACATGTTG     | GACCTCTTCATGGTGAGG      |
